# Supplementary material for: Development of a New Bioequivalent Omeprazole Product
Source: MDPI journal article supplement (doi:10.3390/medicina60030427), 2024-03-02
Supplement: s1 [file s1]

**Subject inclusion criteria:**

- men and women aged 18-45 years inclusive;
- body mass index (BMI) is within normal limits ( $\geq 18.5$  kg/m<sup>2</sup> and  $\leq 30$  kg/m<sup>2</sup>);
- verified diagnosis "healthy": absence of pathology from the gastrointestinal tract, liver, kidneys, cardiovascular system, central nervous system, endocrine system (preliminary standard clinical, laboratory and instrumental studies did not reveal the presence of any diseases; no deviations from standards based on the results of laboratory and instrumental examination methods, including ECG);
- for women, a negative pregnancy test. Women of childbearing age and male participants use barrier methods of contraception. If hormonal contraceptives are used, they should be discontinued while participating in the study;
- availability of written informed consent from the volunteer to participate in the study;
- thermometry (temperature should be from 36.0° to 36.6°).

**Criteria for non-inclusion of subjects:**

- thermometry (temperature should be from 36.0° to 36.6°);
- complicated allergy history, drug intolerance;
- hypersensitivity to Omeprazole and other components of the drug;
- galactose intolerance, lactase deficiency, glucose-galactose deficiency;
- systolic blood pressure less than 100 mm Hg. and more than 130 mm Hg; diastolic blood pressure less than 70 mm Hg. and more than 90 mm Hg; Heart rate is less than 60 beats/min and more than 90 beats/min at rest;
- surgical interventions on the gastrointestinal tract (with the exception of appendectomy);
- acute infectious diseases (influenza) less than 4 weeks before the start of the study;
- regular intake of medications (including vitamins, dietary supplements, medicinal herbs) less than 2 weeks before the start of the study;
- taking medications that have a pronounced effect on hemodynamics, liver function, etc. (barbiturates, omeprazole, cimetidine, etc.) less than 30 days before the start of the study;
- donation (450 ml of blood or plasma or more) less than 2 months before the start of the study;
- patients with chronic alcohol consumption (within the last 2 years), severe gastrointestinal, kidney, liver or cardiovascular diseases, tuberculous epilepsy, asthma (within 5 years), diabetes, psychosis or glaucoma;
- smoking more than 10 cigarettes per day;
- participation in a clinical trial of drugs less than 3 months before the start of the study;
- positive test for drugs and alcohol;
- positive test for HIV, Hepatitis B and C and syphilis (microreaction);
- pregnancy and breastfeeding period.

**Criteria for stopping subjects from participating in the study:**

The Principal Investigator may remove a volunteer from the study at any time if:

- the researcher decided that the volunteer should be excluded in the interests of the volunteer himself;

- adverse events have occurred that, due to their severity, make further participation of the volunteer in the study impossible;
- refusal on the part of the volunteer to follow the requirements of the protocol and carry out research procedures, inclusion of a volunteer in violation of the rules of the protocol (research error);
- the volunteer receives/needs additional treatment that may affect the pharmacokinetics of the study drug;
- the volunteer requires hospital treatment during the study;
- volunteers arrive at the clinic later than the appointed time (more than 1 hour late), which violates the protocol requirements;
- if the volunteer's health deteriorates;
- positive test for drug abuse and drug use;
- positive breath alcohol test;
- positive pregnancy test.

**Table S1.** Comparative assessment of the release kinetics of omeprazole, dosage 20 mg.

| No.                             | Time,<br>min | Test drug           |        | Reference drug      |        |
|---------------------------------|--------------|---------------------|--------|---------------------|--------|
|                                 |              | Release, average, % | RSD, % | Release, average, % | RSD, % |
| Acid resistance stage in pH 1.2 |              |                     |        |                     |        |
| 1.                              | 120          | 8,68                | 0,64   | 3,27                | 2,38   |
| Buffer stage in pH 6.8          |              |                     |        |                     |        |
| 2.                              | 0            | 0                   | 0      | 0                   | 0      |
| 3.                              | 10           | 84,53               | 10,10  | 90,16               | 4,00   |
| 4.                              | 15           | 90,22               | 8,44   | 100,16              | 2,27   |
| 5.                              | 20           | 91,35               | 6,96   | 100,78              | 1,07   |
| 6.                              | 30           | 93,07               | 5,97   | 101,72              | 1,47   |
| 7.                              | 45           | 93,97               | 3,97   | 100,41              | 1,31   |

**Table S2.** Comparative assessment of the release kinetics of omeprazole, dosage 40 mg.

| No.                             | Time,<br>min | Test drug           |        | Reference drug      |        |
|---------------------------------|--------------|---------------------|--------|---------------------|--------|
|                                 |              | Release, average, % | RSD, % | Release, average, % | RSD, % |
| Acid resistance stage in pH 1.2 |              |                     |        |                     |        |
| 1.                              | 120          | 11,90               | 7,78   | 13,82               | 17,66  |
| Buffer stage in pH 6.8          |              |                     |        |                     |        |
| 2.                              | 0            | 0                   | 0      | 0                   | 0      |
| 3.                              | 10           | 86,34               | 3,94   | 68,64               | 2,70   |
| 4.                              | 15           | 88,12               | 3,42   | 81,09               | 0,79   |
| 5.                              | 20           | 90,10               | 1,45   | 85,18               | 1,36   |

|    |    |       |      |       |      |
|----|----|-------|------|-------|------|
| 5. | 30 | 88,90 | 1,57 | 86,69 | 1,47 |
| 7. | 45 | 87,11 | 1,42 | 88,88 | 1,84 |
| f2 |    | 50,03 |      |       |      |

**Table S3.** Long-term stability study results of Omeprazole Viva Pharm, enteric capsules, 20 mg and 40 mg (batch size: 45.68 kg size/200 000 caps. (20 mg)/100 000 caps. (40 mg). Conditions: Temperature: 25°C ± 2°C, and the relative humidity (RH) 60% ± 5%.

| Test                                                           | Method            | Specification                                                                                                                                                                                                                                                                                                                     | Dosage         | Type of package  | Results/Months                      |                                    |                                   |                                                     |                                   |
|----------------------------------------------------------------|-------------------|-----------------------------------------------------------------------------------------------------------------------------------------------------------------------------------------------------------------------------------------------------------------------------------------------------------------------------------|----------------|------------------|-------------------------------------|------------------------------------|-----------------------------------|-----------------------------------------------------|-----------------------------------|
|                                                                |                   |                                                                                                                                                                                                                                                                                                                                   |                |                  | 0                                   | 3                                  | 6                                 | 9                                                   | 12                                |
| <b>Appearance</b>                                              | Visual Inspection | Hard gelatin, cylindrical capsules no. 2 (for dosage 20 mg) and no.0 (for dosage 40 mg), with a cap and body of white or almost white color.<br>The contents of the capsules are a mixture of white or off-white pellets with a cream tint.                                                                                       | 20 mg capsules | HDP bottles      | Conforms                            | Conforms                           | Conforms                          | Conforms                                            | Conforms                          |
|                                                                |                   |                                                                                                                                                                                                                                                                                                                                   |                | Alu/Alu blisters | Conforms                            | Conforms                           | Conforms                          | Conforms                                            | Conforms                          |
|                                                                |                   |                                                                                                                                                                                                                                                                                                                                   | 40 mg capsules | HDP bottles      | Conforms                            | Conforms                           | Conforms                          | Conforms                                            | Conforms                          |
|                                                                |                   |                                                                                                                                                                                                                                                                                                                                   |                | Alu/Alu blisters | Conforms                            | Conforms                           | Conforms                          | Conforms                                            | Conforms                          |
| <b>Average of capsule contents mass and Uniformity of mass</b> | Weighing          | Deviation from the average weight is allowed for 18 capsules out of 20 no more than ± 10.0% and for 2 capsules out of 20 no more than ± 20% (for dosage 20 mg).<br>Deviation from the average weight is allowed for 18 capsules out of 20 no more than ± 7.5% and for 2 capsules out of 20 no more than ± 15% (for dosage 40 mg). | 20 mg capsules | HDP bottles      | 234,1 mg 20/20<br>+ 2,3 %: - 2,3 %  | 235,0 mg 20/20<br>- 5,0 %: + 2,9 % | 234,9 mg 20/20<br>-4,1%: +3,7%    | 229,0 mg;<br>19/20<br>+7,6%; -4,2%<br>1/20: - 12,0% | 234,8 mg 20/20<br>-4,6%: +3,8%    |
|                                                                |                   |                                                                                                                                                                                                                                                                                                                                   |                | Alu/Alu blisters | 235,1 mg 20/20<br>+ 3,3%: - 4,1%    | 234,8 mg 20/20<br>- 2,0%: + 2,7%   | 234,7 mg 20/20<br>-3,1%: +4,2%    | 234,9mg 20/20<br>-5,1%: +3,8%                       | 235,0 mg 20/20<br>-4,2%: +4,8%    |
|                                                                |                   |                                                                                                                                                                                                                                                                                                                                   | 40 mg capsules | HDP bottles      | 458,5 mg 20/20<br>+ 1,0%;<br>- 1,2% | 460,2 mg 20/20<br>- 2,2%;<br>+1,4% | 459,3 mg 20/20<br>-1,2%;<br>+1,9% | 457,2 mg 20/20<br>-1,9%;<br>+1,8%                   | 459,7 mg 20/20<br>-1,0%;<br>+1,7% |
|                                                                |                   |                                                                                                                                                                                                                                                                                                                                   |                | Alu/Alu blisters | 459,6 mg 20/20<br>+ 1,7%;<br>- 1,7% | 458,2 mg 20/20<br>- 1,2%;<br>+1,6% | 459,1 mg 20/20<br>-2,0%;<br>+1,9% | 456,3 mg 20/20<br>-1,6%;<br>+2,0%                   | 458,7 mg 20/20<br>-1,0%;<br>+1,3% |

|                                                                                                                                  |                  |                                                                              |                |                  |                     |                      |                     |                     |                     |
|----------------------------------------------------------------------------------------------------------------------------------|------------------|------------------------------------------------------------------------------|----------------|------------------|---------------------|----------------------|---------------------|---------------------|---------------------|
| Dissolution<br>Acid<br>Resistance<br>stage                                                                                       | HPLC             | No more than 15 % after 2 ч                                                  | 20 mg capsules | HDP bottles      | from 7,5 to 14,6 %  | from 3,6 to 5,4 %    | from 3,6 to 5,4%    | from 3,9 to 6,4%    | from 4,2 to 6,5%    |
|                                                                                                                                  |                  |                                                                              |                | Alu/Alu blisters | from 5,5 to 7,8 %   | from 5,9 to 8,3 %    | from 3,7 to 5,4%    | from 4,8 to 7,2%    | from 4,8 to 6,9%    |
|                                                                                                                                  |                  |                                                                              | 40 mg capsules | HDP bottles      | from 7,6 to 11,8 %  | from 8,4 to 12,4 %   | from 7,6 to 11,9%   | from 7,7 to 11,0%   | from 7,0 to 11,2%   |
|                                                                                                                                  |                  |                                                                              |                | Alu/Alu blisters | from 7,5 to 10,8 %  | from 7,9 to 11,3 %   | from 7,7 to 10,4%   | from 7,8 to 11,2%   | from 7,8 to 10,9%   |
| Dissolution<br>Buffer Stage                                                                                                      | HPLC             | No less than 75 % (for dosage 20 mg) and 70 % (for dosage 40 mg) after 2,5 ч | 20 mg capsules | HDP bottles      | from 75,6 to 78,3%  | from 99,5 to 103,4%  | from 85,6 to 98,2%  | from 99,2 to 101,4% | from 88,6 to 99,1%  |
|                                                                                                                                  |                  |                                                                              |                | Alu/Alu blisters | from 80,9 to 91,3 % | from 86,5 to 101,4 % | from 86,5 to 101,4% | from 88,5 to 99,3 % | from 91,2 to 100,1% |
|                                                                                                                                  |                  |                                                                              | 40 mg capsules | HDP bottles      | from 85,6 to 93,3%  | from 89,9 to 99,8%   | from 75,7 to 99,8%  | from 88,2 to 100,0% | from 77,7 to 95,1%  |
|                                                                                                                                  |                  |                                                                              |                | Alu/Alu blisters | from 75,9 to 89,3%  | from 89,9 to 100,9%  | from 75,9 to 95,2%  | from 76,2 to 93,0%  | from 88,0 to 95,1%  |
| Impurities:<br>- sum of impurities F and G<br>- 5-methoxy-1H-benzimidazole-2-thiol<br>- any other impurity<br>- total impurities | HPLC             | ≤ 0,5 %<br>≤ 0,5 %<br>≤ 0,5 %<br>≤ 2,0 %                                     | 20 mg capsules | HDP bottles      | not detected        | 0,17%                | 0,16%               | 0,19%               | 0,18%               |
|                                                                                                                                  |                  |                                                                              |                |                  | not detected        | 0,18%                | not detected        | 0,04%               | 0,1%                |
|                                                                                                                                  |                  |                                                                              |                |                  | 0,1%                | 0,09%                | 0,09%               | 0,12%               | 0,12%               |
|                                                                                                                                  |                  |                                                                              |                |                  | 0,1%                | 0,14%                | 0,23%               | 0,08%               | 0,15%               |
|                                                                                                                                  |                  |                                                                              | 40 mg capsules | Alu/Alu blisters | not detected        | 0,05 %               | 0,06%               | 0,06%               | 0,05%               |
|                                                                                                                                  |                  |                                                                              |                |                  | not detected        | not detected         | 0,02%               | 0,03%               | 0,1%                |
|                                                                                                                                  |                  |                                                                              |                |                  | not detected        | 0,04%                | not detected        | 0,04%               | 0,09%               |
|                                                                                                                                  |                  |                                                                              |                |                  | not detected        | 0,1%                 | 0,08%               | 0,1%                | 0,11%               |
| 40 mg capsules                                                                                                                   | HDP bottles      | 0,1%                                                                         | 0,05%          | 0,1%             | 0,1%                | 0,15%                |                     |                     |                     |
|                                                                                                                                  |                  | not detected                                                                 | not detected   | 0,08%            | not detected        | 0,08%                |                     |                     |                     |
|                                                                                                                                  |                  | not detected                                                                 | not detected   | 0,09%            | 0,11%               | 0,1%                 |                     |                     |                     |
|                                                                                                                                  |                  | not detected                                                                 | not detected   | 0,12%            | 0,09%               | 0,1%                 |                     |                     |                     |
| 40 mg capsules                                                                                                                   | Alu/Alu blisters | not detected                                                                 | 0,04%          | 0,05%            | 0,1%                | 0,1%                 |                     |                     |                     |
|                                                                                                                                  |                  | not detected                                                                 | 0,05%          | 0,05%            | 0,03%               | 0,08%                |                     |                     |                     |
|                                                                                                                                  |                  | not detected                                                                 | not detected   | 0,04%            | 0,05%               | 0,1%                 |                     |                     |                     |
|                                                                                                                                  |                  | not detected                                                                 | not detected   | not detected     | 0,1%                | 0,11%                |                     |                     |                     |
| Assay:                                                                                                                           | HPLC             |                                                                              |                | HDP bottles      | 20,9                | 19,7                 | 21,5                | 21,5                | 21,0                |

|                                                        |        |                                                                                              |                |                  |              |              |              |              |              |
|--------------------------------------------------------|--------|----------------------------------------------------------------------------------------------|----------------|------------------|--------------|--------------|--------------|--------------|--------------|
| - omeprazole                                           |        | From 18,0 to 22,0 mg/caps (for dosage 20 mg)<br>From 36,0 to 44,0 mg/caps (for dosage 20 mg) | 20 mg capsules | Alu/Alu blisters | 19,9         | 19,9         | 21,3         | 21,0         | 20,8         |
|                                                        |        |                                                                                              | 40 mg capsules | HDP bottles      | 39,3         | 40,2         | 41,4         | 39,2         | 39,9         |
|                                                        |        |                                                                                              |                | Alu/Alu blisters | 38,1         | 41,5         | 40,9         | 40,9         | 39,2         |
| <b>Total Aerobic Microbial Count (TAMC), cfu/1 g</b>   | Direct | $\leq 10^3$                                                                                  | 20 mg capsules | HDP bottles      | < 10 cfu/g   |
|                                                        |        |                                                                                              |                | Alu/Alu blisters | < 10 cfu/g   |
|                                                        |        |                                                                                              | 40 mg capsules | HDP bottles      | < 10 cfu/g   |
|                                                        |        |                                                                                              |                | Alu/Alu blisters | < 10 cfu/g   |
| <b>Total Combined Yeasts and Moulds Count, cfu/1 g</b> | Direct | $\leq 10^2$                                                                                  | 20 mg capsules | HDP bottles      | < 10 cfu/g   |
|                                                        |        |                                                                                              |                | Alu/Alu blisters | < 10 cfu/g   |
|                                                        |        |                                                                                              | 40 mg capsules | HDP bottles      | < 10 cfu/g   |
|                                                        |        |                                                                                              |                | Alu/Alu blisters | < 10 cfu/g   |
| <b>Escherichia coli</b><br>in 1 g                      | Direct | Absence in 1 g                                                                               | 20 mg capsules | HDP bottles      | not detected |
|                                                        |        |                                                                                              |                | Alu/Alu blisters | not detected |
|                                                        |        |                                                                                              | 40 mg capsules | HDP bottles      | not detected |
|                                                        |        |                                                                                              |                | Alu/Alu blisters | not detected |

**Table S4.** Accelerated stability study results of Omeprazole Viva Pharm, enteric capsules, 20 mg and 40 mg (batch size: 45.68 kg size/200 000 caps. (20 mg)/100 000 caps. (40 mg). Conditions: Temperature: 40°C ± 2°C, and the relative humidity (RH) 75% ± 5%.

| Test                                                           | Method            | Specification                                                                                                                                                                                                                                                                                                                     | Dosage         | Type of package  | Results/Months                       |                                    |                                   |                                                     |                                                     |
|----------------------------------------------------------------|-------------------|-----------------------------------------------------------------------------------------------------------------------------------------------------------------------------------------------------------------------------------------------------------------------------------------------------------------------------------|----------------|------------------|--------------------------------------|------------------------------------|-----------------------------------|-----------------------------------------------------|-----------------------------------------------------|
|                                                                |                   |                                                                                                                                                                                                                                                                                                                                   |                |                  | 0                                    | 1                                  | 2                                 | 3                                                   | 6                                                   |
| <b>Appearance</b>                                              | Visual Inspection | Hard gelatin, cylindrical capsules no. 2 (for dosage 20 mg) and no.0 (for dosage 40 mg), with a cap and body of white or almost white color. The contents of the capsules are a mixture of white or off-white pellets with a cream tint.                                                                                          | 20 mg capsules | HDP bottles      | Conforms                             | Conforms                           | Conforms                          | Conforms                                            | Conforms                                            |
|                                                                |                   |                                                                                                                                                                                                                                                                                                                                   |                | Alu/Alu blisters | Conforms                             | Conforms                           | Conforms                          | Conforms                                            | Conforms                                            |
|                                                                |                   |                                                                                                                                                                                                                                                                                                                                   | 40 mg capsules | HDP bottles      | Conforms                             | Conforms                           | Conforms                          | Conforms                                            | Conforms                                            |
|                                                                |                   |                                                                                                                                                                                                                                                                                                                                   |                | Alu/Alu blisters | Conforms                             | Conforms                           | Conforms                          | Conforms                                            | Conforms                                            |
| <b>Average of capsule contents mass and Uniformity of mass</b> | Weighing          | Deviation from the average weight is allowed for 18 capsules out of 20 no more than ± 10.0% and for 2 capsules out of 20 no more than ± 20% (for dosage 20 mg).<br>Deviation from the average weight is allowed for 18 capsules out of 20 no more than ± 7.5% and for 2 capsules out of 20 no more than ± 15% (for dosage 40 mg). | 20 mg capsules | HDP bottles      | 235,2 mg 20/20<br>+ 4,3 %: - 2,8 %   | 235,2 mg 20/20<br>- 2,3 %: + 2,8 % | 232,8 mg 20/20<br>-5,2%: +4,1%    | 230,0 mg;<br>19/20<br>+6,6%; -5,3%<br>1/20: - 12,0% | 229,0 mg;<br>19/20<br>+7,6%; -4,2%<br>1/20: - 12,0% |
|                                                                |                   |                                                                                                                                                                                                                                                                                                                                   |                | Alu/Alu blisters | 239,1 mg 20/20<br>+ 2,3%: - 428%     | 239,8 mg 20/20<br>- 3,0%: + 2,9%   | 238,6 mg 20/20<br>-3,8%: +5,1%    | 239,9mg 20/20<br>-3,1%: +4,1%                       | 238,0 mg 20/20<br>-2,2%: +4,6%                      |
|                                                                |                   |                                                                                                                                                                                                                                                                                                                                   | 40 mg capsules | HDP bottles      | 459,0 mg 20/20<br>+ 2,0%;<br>- 2,7%  | 459,2 mg 20/20<br>- 2,2%;<br>+2,7% | 457,7 mg 20/20<br>-2,2%;<br>+1,9% | 458,5 mg 20/20<br>-1,9%;<br>+1,9%                   | 458,9 mg 20/20<br>-2,1%;<br>+2,8%                   |
|                                                                |                   |                                                                                                                                                                                                                                                                                                                                   |                | Alu/Alu blisters | 460,1 mg 20/20:<br>+ 1,9%;<br>- 1,3% | 459,0 mg 20/20<br>- 1,3%;<br>+1,6% | 457,3 mg 20/20<br>-1,9%;<br>+2,8% | 457,9 mg 20/20<br>-1,8%;<br>+1,0%                   | 458,6 mg 20/20<br>-1,8%;<br>+1,3%                   |
| <b>Dissolution</b><br>Acid Resistance stage                    | HPLC              | No more than 15 % after 2 ч                                                                                                                                                                                                                                                                                                       | 20 mg capsules | HDP bottles      | from 7,7 to 10,9 %                   | from 5,5 to 7,1 %                  | from 4,0 to 5,3%                  | from 3,8 to 6,4%                                    | from 4,9 to 6,8%                                    |
|                                                                |                   |                                                                                                                                                                                                                                                                                                                                   |                | Alu/Alu blisters | from 5,5 to 6,9 %                    | from 6,0 to 7,1 %                  | from 4,7 to 6,5%                  | from 5,5 to 7,0%                                    | from 4,0 to 6,0%                                    |

|                                                                                                                                  |      |                                                                              |                |                  |                              |                                              |                                       |                     |                    |
|----------------------------------------------------------------------------------------------------------------------------------|------|------------------------------------------------------------------------------|----------------|------------------|------------------------------|----------------------------------------------|---------------------------------------|---------------------|--------------------|
|                                                                                                                                  |      |                                                                              | 40 mg capsules | HDP bottles      | from 7,7 to 11,1 %           | from 7,3 to 12,0 %                           | from 6,6 to 10,0%                     | from 7,1 to 12,0%   | from 7,7 to 10,3%  |
|                                                                                                                                  |      |                                                                              |                | Alu/Alu blisters | from 7,8 to 11,8 %           | from 6,9 to 10,2 %                           | from 7,6 to 9,9%                      | from 6,8 to 11,5%   | from 7,5 to 11,2%  |
| Dissolution Buffer Stage                                                                                                         | HPLC | No less than 75 % (for dosage 20 mg) and 70 % (for dosage 40 mg) after 2,5 ч | 20 mg capsules | HDP bottles      | from 77,7 to 79,6%           | from 88,7 to 99,8%                           | from 89,0 to 101,1%                   | from 88,0 to 99,3%  | from 88,8 to 99,1% |
|                                                                                                                                  |      |                                                                              |                | Alu/Alu blisters | from 80,9 to 92,7 %          | from 88,5 to 100,0 %                         | from 86,5 to 101,2%                   | from 86,0 to 99.2 % | from 90,2 to 99,0% |
|                                                                                                                                  |      |                                                                              | 40 mg capsules | HDP bottles      | from 76,6 to 91,7%           | from 80,9 to 95,7%                           | from 79,7 to 96,6%                    | from 80,2 to 99,0%  | from 79,9 to 96,9% |
|                                                                                                                                  |      |                                                                              |                | Alu/Alu blisters | from 78,0 to 89,9%           | from 79,9 to 101.0%                          | from 80,2 to 96,2%                    | from 79,5 to 95,0%  | from 79,9 to 99,1% |
| Impurities:<br>- sum of impurities F and G<br>- 5-methoxy-1H-benzimidazole-2-thiol<br>- any other impurity<br>- total impurities | HPLC | ≤ 0,5%<br>≤ 0,5 %<br>≤ 0,5 %<br>≤ 2,0 %                                      | 20 mg capsules | HDP bottles      | not detected                 | 0,19%                                        | 0,16%                                 | 0,1%                | 0,19%              |
|                                                                                                                                  |      |                                                                              |                |                  | not detected                 | 0,19%                                        | 0,18%                                 | 0,1%                | 0,18%              |
|                                                                                                                                  |      |                                                                              |                |                  | not detected                 | 0,09%                                        | 0,1%                                  | 0,12%               | 0,15%              |
|                                                                                                                                  |      |                                                                              |                |                  | not detected                 | 0,13%                                        | 0,18%                                 | 0,15%               | 0,15%              |
|                                                                                                                                  |      |                                                                              | 40 mg capsules | Alu/Alu blisters | not detected                 | 0,05 %                                       | 0,05%                                 | 0,06%               | 0,06%              |
|                                                                                                                                  |      |                                                                              |                |                  | 0,05<br>not detected<br>0,08 | not detected<br>not detected<br>not detected | not detected<br>not detected<br>0,08% | 0,04%<br>0,1%       | 0,08%<br>0,12%     |
| Assay:<br>- omeprazole                                                                                                           | HPLC | From 18,0 to 22,0 mg/caps (for dosage 20 mg)                                 | 20 mg capsules | HDP bottles      | 19,9                         | 19,7                                         | 20,4                                  | 21,4                | 21,0               |
|                                                                                                                                  |      |                                                                              |                | Alu/Alu blisters | 20,9                         | 19,8                                         | 20,5                                  | 21,2                | 20,7               |
|                                                                                                                                  |      |                                                                              |                | HDP bottles      | 40,1                         | 41,0                                         | 41,4                                  | 40,2                | 39,8               |

|                                                        |        |                                              |                |                  |              |              |              |              |              |
|--------------------------------------------------------|--------|----------------------------------------------|----------------|------------------|--------------|--------------|--------------|--------------|--------------|
|                                                        |        | From 36,0 to 44,0 mg/caps (for dosage 20 mg) | 40 mg capsules | Alu/Alu blisters | 39,2         | 40,5         | 39,9         | 40,2         | 40,2         |
| <b>Total Aerobic Microbial Count (TAMC), cfu/1 g</b>   | Direct | $\leq 10^3$                                  | 20 mg capsules | HDP bottles      | < 10 cfu/g   |
|                                                        |        |                                              |                | Alu/Alu blisters | < 10 cfu/g   |
|                                                        |        |                                              | 40 mg capsules | HDP bottles      | < 10 cfu/g   |
|                                                        |        |                                              |                | Alu/Alu blisters | < 10 cfu/g   |
| <b>Total Combined Yeasts and Moulds Count, cfu/1 g</b> | Direct | $\leq 10^2$                                  | 20 mg capsules | HDP bottles      | < 10 cfu/g   |
|                                                        |        |                                              |                | Alu/Alu blisters | < 10 cfu/g   |
|                                                        |        |                                              | 40 mg capsules | HDP bottles      | < 10 cfu/g   |
|                                                        |        |                                              |                | Alu/Alu blisters | < 10 cfu/g   |
| <b>Escherichia coli in 1 g</b>                         | Direct | Absence in 1 g                               | 20 mg capsules | HDP bottles      | not detected |
|                                                        |        |                                              |                | Alu/Alu blisters | not detected |
|                                                        |        |                                              | 40 mg capsules | HDP bottles      | not detected |
|                                                        |        |                                              |                | Alu/Alu blisters | not detected |



**Table S5.** Concentrations of omeprazole in the blood plasma of volunteers (ng/ml) after a single dose of the drug Omeprazole (test drug "T").

| Time (t)<br>after<br>drug<br>administra-<br>tion<br>(planned)<br>, h |              |              |              |              |              |              |         |         |                   |              |              |              |             |             |              |              |              |              |              |              |              |              |              |              |              |              |              |              |              |              |             |      |
|----------------------------------------------------------------------|--------------|--------------|--------------|--------------|--------------|--------------|---------|---------|-------------------|--------------|--------------|--------------|-------------|-------------|--------------|--------------|--------------|--------------|--------------|--------------|--------------|--------------|--------------|--------------|--------------|--------------|--------------|--------------|--------------|--------------|-------------|------|
|                                                                      | 03           | 04           | 06           | 07           | 08           | 10           | 11      | 14      | 18                | 20           | 22           | 24           | 01          | 02          | 05           | 09           | 12           | 13           | 15           | 16           | 17           | 19           | 21           | 23           | Mean         | Gmean        | Media<br>na  | Mini<br>mum  | Maxi<br>mum  | SD           | CV          |      |
|                                                                      | I            | I            | I            | I            | I            | I            | I       | I       | I                 | I            | I            | I            | II          | II          | II           | II           | II           | II           | II           | II           | II           | II           | II           | II           |              |              |              |              |              |              |             |      |
| 0.00                                                                 | 0.000        | 0.000        | 0.000        | 0.000        | 0.000        | 0.000        | 0.000   | 0.000   | 0.000             | 0.000        | 0.000        | 0.000        | 0.000       | 0.000       | 0.000        | 0.000        | 0.000        | 0.000        | 0.000        | 0.000        | 0.000        | 0.000        | 0.000        | 0.000        | 0.000        | 0.000        | 0.000        | 0.000        | 0.000        | 0.000        | -           |      |
| 0.50                                                                 | 0.000        | 0.000        | 32.971       | 39.655       | 31.270       | 28.607       | 0.000   | 29.866  | 0.000             | 27.647       | 26.454       | 0.000        | 26.006      | 26.675      | 27.007       | 0.000        | 0.000        | 0.000        | 33.565       | 25.100       | 0.000        | 29.910       | 0.000        | 25.554       | 17.095       | 29.073       | 25.780       | 0.000        | 39.655       | 15.064       | 88.1        |      |
| 1.00                                                                 | 251.71<br>2  | 239.15<br>2  | 335.29<br>8  | 377.578      | 195.235      | 196.051      | 142.800 | 100.453 | 302.82<br>2       | 365.50<br>9  | 255.96<br>2  | 228.90<br>8  | 253.23<br>6 | 191.33<br>0 | 289.06<br>1  | 236.99<br>8  | 191.10<br>6  | 254.03<br>8  | 280.08<br>9  | 309.05<br>0  | 295.45<br>2  | 369.28<br>3  | 286.34<br>4  | 255.60<br>4  | 258.46<br>2  | 248.32<br>4  | 254.82<br>1  | 100.45<br>3  | 377.57<br>8  | 68.843       | 26.6        |      |
| 1.50                                                                 | 992.64<br>0  | 945.66<br>6  | 1316.1<br>84 | 1066.06<br>0 | 529.150      | 528.569      | 398.066 | 224.889 | 505.03<br>0       | 594.79<br>1  | 945.32<br>1  | 684.75<br>5  | 531.83<br>9 | 652.05<br>8 | 593.36<br>7  | 801.06<br>7  | 549.49<br>0  | 1052.6<br>95 | 968.46<br>3  | 809.20<br>0  | 434.36<br>7  | 519.21<br>7  | 501.64<br>6  | 939.26<br>0  | 711.82<br>5  | 662.39<br>9  | 623.42<br>4  | 224.88<br>9  | 1316.1<br>84 | 265.75<br>0  | 37.3        |      |
| 2.00                                                                 | 1218.6<br>14 | 1167.6<br>36 | 1597.8<br>60 | 1716.50<br>2 | 740.815      | 738.469      | 698.520 | 677.078 | 736.78<br>8       | 878.40<br>0  | 1143.9<br>76 | 1315.0<br>34 | 770.16<br>8 | 994.80<br>4 | 983.77<br>7  | 1227.5<br>25 | 947.00<br>0  | 1139.1<br>29 | 1492.4<br>15 | 1062.5<br>76 | 707.91<br>1  | 914.24<br>7  | 689.66<br>3  | 1140.2<br>86 | 1029.1<br>33 | 990.33<br>0  | 989.29<br>1  | 677.07<br>8  | 1716.5<br>02 | 298.05<br>3  | 29.0        |      |
| 2.50                                                                 | 1223.8<br>86 | 1147.9<br>88 | 1688.3<br>30 | 1734.93<br>4 | 1269.30<br>3 | 1264.71<br>5 | 945.489 | 0       | 1286.59<br>05     | 1050.2<br>30 | 1210.0<br>24 | 1038.8<br>91 | 1165.8<br>9 | 881.89<br>8 | 893.40<br>63 | 1235.6<br>03 | 1092.9<br>74 | 1095.6<br>70 | 1040.8<br>44 | 1154.7<br>04 | 1380.7<br>2  | 928.66<br>89 | 1314.9<br>1  | 906.57<br>80 | 1038.8<br>98 | 1166.2<br>21 | 1148.1<br>66 | 1151.3<br>9  | 881.89<br>34 | 1734.9<br>7  | 219.61<br>7 | 18.8 |
| 3.00                                                                 | 915.75<br>4  | 902.31<br>2  | 1426.0<br>38 | 1432.50<br>4 | 1401.14<br>8 | 1399.64<br>8 | 894.313 | 2       | 1352.89<br>91     | 1220.1<br>22 | 1405.4<br>9  | 868.54<br>05 | 1044.6<br>1 | 971.54<br>2 | 794.77<br>55 | 1293.0<br>2  | 968.86<br>9  | 903.26<br>5  | 865.39<br>3  | 956.26<br>7  | 987.94<br>11 | 1505.9<br>91 | 1984.0<br>57 | 1470.1<br>7  | 869.21<br>7  | 1159.7<br>44 | 1125.2<br>93 | 1016.2<br>76 | 794.77<br>2  | 1984.0<br>91 | 300.94<br>6 | 25.9 |
| 4.00                                                                 | 684.70<br>9  | 647.18<br>6  | 1088.8<br>30 | 1086.96<br>3 | 871.999      | 883.226      | 484.315 | 8       | 1112.96<br>740.16 | 856.62<br>9  | 687.99<br>6  | 797.99<br>3  | 729.85<br>2 | 532.51<br>1 | 782.67<br>4  | 655.79<br>0  | 507.07<br>4  | 658.79<br>0  | 665.97<br>4  | 545.02<br>7  | 986.93<br>1  | 1301.4<br>58 | 940.21<br>4  | 697.97<br>0  | 789.46<br>9  | 763.61<br>6  | 735.01<br>0  | 484.31<br>5  | 1301.4<br>58 | 211.78<br>0  | 26.8        |      |
| 5.00                                                                 | 358.63<br>8  | 353.76<br>6  | 511.00<br>4  | 701.817      | 464.526      | 368.952      | 237.565 | 771.882 | 329.29<br>6       | 374.58<br>6  | 458.83<br>8  | 474.96<br>6  | 445.98<br>1 | 434.51<br>0 | 500.83<br>3  | 533.80<br>5  | 378.51<br>7  | 468.95<br>4  | 480.22<br>8  | 387.04<br>7  | 368.57<br>7  | 487.14<br>6  | 349.53<br>0  | 465.88<br>3  | 446.11<br>9  | 433.32<br>6  | 452.40<br>9  | 237.56<br>5  | 771.88<br>2  | 114.09<br>7  | 25.6        |      |
| 6.00                                                                 | 248.58<br>4  | 236.57<br>2  | 353.42<br>6  | 341.990      | 266.492      | 279.976      | 212.185 | 456.730 | 263.90<br>4       | 299.00<br>9  | 321.67<br>4  | 280.67<br>6  | 210.00<br>0 | 236.73<br>4 | 212.19<br>4  | 290.20<br>3  | 244.94<br>9  | 326.65<br>1  | 230.60<br>1  | 225.63<br>2  | 231.06<br>3  | 308.11<br>6  | 221.32<br>3  | 330.03<br>3  | 276.19<br>6  | 270.83<br>8  | 265.19<br>8  | 210.00<br>0  | 456.73<br>0  | 58.807       | 21.3        |      |
| 8.00                                                                 | 126.51<br>1  | 122.09<br>5  | 184.60<br>5  | 175.873      | 140.769      | 143.230      | 77.541  | 268.062 | 103.27<br>5       | 117.54<br>3  | 115.50<br>6  | 123.87<br>9  | 105.90<br>6 | 136.51<br>1 | 120.56<br>4  | 169.14<br>9  | 93.598       | 113.42<br>4  | 140.30<br>1  | 136.22<br>6  | 104.73<br>0  | 141.43<br>5  | 98.727       | 117.29<br>1  | 132.36<br>5  | 128.00<br>7  | 122.98<br>7  | 77.541       | 268.06<br>2  | 38.530       | 29.1        |      |
| 12.0                                                                 | 28.774       | 28.545       | 42.327       | 41.486       | 28.590       | 25.312       | 0.000   | 26.863  | 27.388            | 30.931       | 31.333       | 27.312       | 0.000       | 0.000       | 27.813       | 27.850       | 28.243       | 27.763       | 25.952       | 0.000        | 30.367       | 39.978       | 28.922       | 32.376       | 25.339       | 30.065       | 28.046       | 0.000        | 42.327       | 12.436       | 49.1        |      |

**Table S6.** Concentrations of omeprazole in the blood plasma of volunteers (ng/ml) after a single dose of Losec® (reference drug “R”).

| Time<br>(t) after<br>drug<br>admini-<br>stration<br>(plan-<br>ned),<br>h |      |      |      |       |       |       |       |       |      |      |      |      |      |      |      |      |      |      |      |      |      |      |      |      | Mea-<br>n | Gm-<br>ean | Medi-<br>ana | Min-<br>imu-<br>m | Max-<br>imu-<br>m | SD   | CV   |   |
|--------------------------------------------------------------------------|------|------|------|-------|-------|-------|-------|-------|------|------|------|------|------|------|------|------|------|------|------|------|------|------|------|------|-----------|------------|--------------|-------------------|-------------------|------|------|---|
|                                                                          | 01   | 02   | 05   | 09    | 12    | 13    | 15    | 16    | 17   | 19   | 21   | 23   | 03   | 04   | 06   | 07   | 08   | 10   | 11   | 14   | 18   | 20   | 22   | 24   |           |            |              |                   |                   |      |      |   |
|                                                                          | I    | I    | I    | I     | I     | I     | I     | I     | I    | I    | I    | I    | II   |           |            |              |                   |                   |      |      |   |
| 0.0                                                                      | 0.00 | 0.00 | 0.00 |       |       |       |       |       | 0.00 | 0.00 | 0.00 | 0.00 | 0.00 | 0.00 | 0.00 | 0.00 | 0.00 | 0.00 | 0.00 | 0.00 | 0.00 | 0.00 | 0.00 | 0.00 | 0.00      | 0.00       | -            | 0.00              | 0.00              | 0.00 | 0.00 | - |
| 0.5                                                                      | 31.6 | 28.5 | 30.3 | 29.51 | 25.28 |       |       |       | 26.9 | 0.00 | 0.00 | 0.00 | 0.00 | 0.00 | 27.1 | 0.00 | 0.00 | 0.00 | 0.00 | 0.00 | 44.6 | 39.6 | 31.6 | 33.1 | 14.5      | 31.2       | 0.00         | 0.00              | 44.6              | 16.5 | 114. |   |
| 0                                                                        | 23   | 07   | 89   | 8     | 4     | 0.000 | 0.000 | 0.000 | 34   | 0    | 0    | 0    | 0    | 0    | 88   | 0    | 0    | 0    | 0    | 0    | 80   | 40   | 84   | 07   | 23        | 56         | 0            | 0                 | 80                | 72   | 1    |   |
| 1.0                                                                      | 217. | 279. | 225. | 221.9 | 237.4 | 262.5 | 241.6 | 209.8 | 278. | 341. | 307. | 228. | 184. | 200. | 263. | 281. | 279. | 292. | 193. | 247. | 332. | 413. | 330. | 354. | 267.      | 262.       | 262.         | 184.              | 413.              | 57.2 |      |   |
| 0                                                                        | 944  | 541  | 365  | 42    | 35    | 13    | 55    | 29    | 455  | 168  | 071  | 244  | 154  | 758  | 287  | 593  | 651  | 748  | 578  | 877  | 190  | 725  | 300  | 387  | 725       | 161        | 900          | 154               | 725               | 33   | 21.4 |   |
| 1.5                                                                      | 862. | 1094 | 897. | 885.8 | 889.1 | 1069. | 985.2 | 636.1 | 933. | 573. | 511. | 674. | 604. | 424. | 904. | 601. | 579. | 612. | 557. | 1012 | 1132 | 1067 | 880. | 913. | 796.      | 767.       | 871.         | 424.              | 1132              | 212. |      |   |
| 0                                                                        | 526  | .910 | 765  | 81    | 47    | 999   | 75    | 79    | 500  | 383  | 818  | 184  | 581  | 628  | 271  | 901  | 299  | 259  | 921  | .103 | .124 | .719 | 643  | 513  | 064       | 491        | 584          | 628               | .124              | 641  | 26.7 |   |
| 2.0                                                                      | 1301 | 1343 | 1159 | 1327. | 817.4 | 1163. | 1066. | 1187. | 1221 | 1075 | 739. | 1288 | 926. | 590. | 1375 | 866. | 742. | 1007 | 933. | 1101 | 1698 | 1404 | 1153 | 1183 | 1111      | 1082       | 1156         | 590.              | 1698              | 252. |      |   |
| 0                                                                        | .387 | .552 | .069 | 830   | 10    | 493   | 764   | 371   | .420 | .465 | 502  | .543 | 910  | 397  | .391 | 924  | 674  | .402 | 018  | .525 | .926 | .304 | .976 | .633 | .537      | .035       | .522         | 397               | .926              | 874  | 22.7 |   |
| 2.5                                                                      | 1201 | 1387 | 1431 | 1145. | 1146. | 1069. | 978.9 | 1280. | 1121 | 1215 | 1061 | 1151 | 831. | 697. | 1237 | 1015 | 999. | 1270 | 1055 | 1008 | 1352 | 1789 | 1500 | 1563 | 1188      | 1165       | 1148         | 697.              | 1789              | 238. |      |   |
| 0                                                                        | .919 | .052 | .989 | 142   | 325   | 933   | 85    | 577   | .534 | .542 | .367 | .065 | 391  | 287  | .065 | .503 | 300  | .354 | .676 | .836 | .077 | .898 | .225 | .254 | .012      | .069       | .695         | 287               | .898              | 776  | 20.1 |   |
| 3.0                                                                      | 1067 | 941. | 1441 | 1017. | 839.1 | 867.1 | 859.8 | 1129. | 873. | 1440 | 1218 | 994. | 742. | 782. | 1106 | 1109 | 1068 | 1315 | 850. | 862. | 1130 | 1311 | 1077 | 1130 | 1049      | 1031       | 1068         | 742.              | 1441              | 198. |      |   |
| 0                                                                        | .688 | 309  | .788 | 964   | 20    | 18    | 59    | 343   | 473  | .801 | .077 | 018  | 327  | 761  | .697 | .844 | .367 | .246 | 573  | 632  | .949 | .268 | .753 | .640 | .151      | .637       | .027         | 327               | .788              | 122  | 18.9 |   |
| 4.0                                                                      | 640. | 657. | 666. | 661.6 | 527.3 | 710.3 | 645.5 | 719.9 | 648. | 874. | 738. | 767. | 505. | 589. | 764. | 840. | 798. | 812. | 477. | 664. | 825. | 716. | 589. | 627. | 686.      | 678.       | 665.         | 477.              | 874.              | 105. |      |   |
| 0                                                                        | 195  | 128  | 690  | 56    | 90    | 18    | 48    | 78    | 721  | 455  | 605  | 802  | 912  | 269  | 785  | 954  | 013  | 555  | 413  | 936  | 816  | 983  | 933  | 210  | 344       | 269        | 813          | 413               | 455               | 607  | 15.4 |   |
| 5.0                                                                      | 367. | 400. | 388. | 388.5 | 303.4 | 477.1 | 434.9 | 425.7 | 504. | 392. | 324. | 452. | 409. | 295. | 625. | 490. | 476. | 524. | 358. | 447. | 578. | 444. | 325. | 458. | 428.      | 421.       | 430.         | 295.              | 625.              | 82.3 |      |   |
| 0                                                                        | 148  | 458  | 010  | 34    | 99    | 42    | 69    | 05    | 649  | 903  | 664  | 244  | 027  | 643  | 222  | 737  | 579  | 700  | 633  | 873  | 868  | 327  | 530  | 826  | 995       | 531        | 337          | 643               | 222               | 68   | 19.2 |   |
| 6.0                                                                      | 243. | 269. | 263. | 263.6 | 221.7 | 334.6 | 307.3 | 250.5 | 352. | 321. | 261. | 270. | 221. | 172. | 331. | 246. | 235. | 218. | 218. | 317. | 278. | 299. | 249. | 258. | 266.      | 263.       | 262.         | 172.              | 352.              | 44.1 |      |   |
| 0                                                                        | 352  | 081  | 242  | 22    | 26    | 27    | 39    | 13    | 498  | 426  | 736  | 570  | 361  | 400  | 847  | 324  | 386  | 674  | 156  | 128  | 843  | 997  | 889  | 044  | 991       | 437        | 489          | 400               | 498               | 95   | 16.6 |   |
| 8.0                                                                      | 137. | 138. | 146. | 147.1 | 118.1 | 116.6 | 105.5 | 109.0 | 124. | 125. | 100. | 122. | 128. | 86.2 | 200. | 124. | 119. | 117. | 82.4 | 109. | 174. | 183. | 151. | 155. | 130.      | 127.       | 124.         | 82.4              | 200.              | 28.6 |      |   |
| 0                                                                        | 400  | 536  | 170  | 33    | 48    | 16    | 70    | 22    | 996  | 990  | 858  | 840  | 476  | 97   | 759  | 073  | 777  | 077  | 06   | 538  | 550  | 778  | 708  | 995  | 321       | 430        | 534          | 06                | 759               | 75   | 22.0 |   |
| 12.                                                                      | 28.6 | 30.0 | 31.7 | 31.11 |       | 29.27 | 25.24 |       | 34.4 | 35.4 | 28.8 | 26.8 | 0.00 | 0.00 | 38.5 | 0.00 | 0.00 | 28.3 | 25.2 | 26.7 | 36.4 | 31.6 | 26.2 | 28.2 | 22.6      | 29.9       | 28.3         | 0.00              | 38.5              | 13.7 |      |   |
| 0                                                                        | 65   | 31   | 26   | 4     | 0.000 | 5     | 8     | 0.000 | 03   | 65   | 84   | 50   | 0    | 0    | 89   | 0    | 0    | 77   | 49   | 41   | 87   | 30   | 49   | 47   | 35        | 50         | 12           | 0                 | 89                | 67   | 60.8 |   |

**Table S7.** Pharmacokinetic parameters of omeprazole in the blood plasma of volunteers after a single dose of the drug Omeprazole (test drug "T").

| Randomized № | Period | T <sub>1/2</sub><br>h | t <sub>max</sub><br>h | C <sub>max</sub><br>ng/ml | AUC <sub>0→t</sub><br>ng/ml×h | AUC <sub>0→∞</sub><br>ng/ml×h | AUMC<br>ng/ml×h <sup>2</sup> | MR<br>T<br>h | C <sub>max</sub> /AUC <sub>0→t</sub><br>h <sup>-1</sup> | C <sub>max</sub> /AUC <sub>0→∞</sub><br>h <sup>-1</sup> |
|--------------|--------|-----------------------|-----------------------|---------------------------|-------------------------------|-------------------------------|------------------------------|--------------|---------------------------------------------------------|---------------------------------------------------------|
| 01           | II     | 1.4                   | 3.0                   |                           |                               |                               |                              |              |                                                         |                                                         |
|              |        | 2                     | 0                     | 971.541                   | 3556.97                       | 3773.22                       | 12477.07                     | 3.51         | 0.2731                                                  | 0.2575                                                  |
| 02           | II     | 1.9                   | 2.0                   |                           |                               |                               |                              |              |                                                         |                                                         |
|              |        | 7                     | 0                     | 994.804                   | 3433.85                       | 3821.40                       | 12016.47                     | 3.50         | 0.2897                                                  | 0.2603                                                  |
| 03           | I      | 1.9                   | 2.5                   | 1223.88                   |                               |                               |                              |              |                                                         |                                                         |
|              |        | 3                     | 0                     | 6                         | 4383.54                       | 4463.54                       | 16175.37                     | 3.69         | 0.2792                                                  | 0.2742                                                  |
| 04           | I      | 1.9                   | 2.0                   | 1167.63                   |                               |                               |                              |              |                                                         |                                                         |
|              |        | 4                     | 0                     | 6                         | 4206.14                       | 4286.13                       | 15563.72                     | 3.70         | 0.2776                                                  | 0.2724                                                  |
| 05           | II     | 2.0                   | 3.0                   | 1293.05                   |                               |                               |                              |              |                                                         |                                                         |
|              |        | 2                     | 0                     | 5                         | 4553.35                       | 4634.51                       | 17139.70                     | 3.76         | 0.2840                                                  | 0.2790                                                  |
| 06           | I      | 1.9                   | 2.5                   | 1688.33                   |                               |                               |                              |              |                                                         |                                                         |
|              |        | 5                     | 0                     | 0                         | 6323.29                       | 6442.65                       | 23617.43                     | 3.73         | 0.2670                                                  | 0.2621                                                  |
| 07           | I      | 1.9                   | 2.5                   | 1734.93                   |                               |                               |                              |              |                                                         |                                                         |
|              |        | 6                     | 0                     | 4                         | 6454.10                       | 6571.64                       | 24258.01                     | 3.76         | 0.2688                                                  | 0.2640                                                  |
| 08           | I      | 1.7                   | 3.0                   | 1401.14                   |                               |                               |                              |              |                                                         |                                                         |
|              |        | 8                     | 0                     | 8                         | 4649.50                       | 4723.05                       | 18256.00                     | 3.93         | 0.3014                                                  | 0.2967                                                  |
| 09           | II     | 1.8                   | 2.0                   | 1227.52                   |                               |                               |                              |              |                                                         |                                                         |
|              |        | 0                     | 0                     | 5                         | 4593.94                       | 4666.20                       | 18124.87                     | 3.95         | 0.2672                                                  | 0.2631                                                  |
| 10           | I      | 1.7                   | 3.0                   | 1399.64                   |                               |                               |                              |              |                                                         |                                                         |
|              |        | 1                     | 0                     | 8                         | 4580.40                       | 4642.86                       | 17912.63                     | 3.91         | 0.3056                                                  | 0.3015                                                  |
| 11           | I      | 1.4                   | 2.5                   |                           |                               |                               |                              |              |                                                         |                                                         |
|              |        | 7                     | 0                     | 945.489                   | 2880.87                       | 3044.90                       | 9917.61                      | 3.44         | 0.3282                                                  | 0.3105                                                  |
| 12           | II     | 1.8                   | 2.5                   | 1095.67                   |                               |                               |                              |              |                                                         |                                                         |
|              |        | 1                     | 0                     | 4                         | 3659.38                       | 3732.96                       | 13906.22                     | 3.80         | 0.2994                                                  | 0.2935                                                  |
| 13           | II     | 1.7                   | 2.0                   | 1139.12                   |                               |                               |                              |              |                                                         |                                                         |
|              |        | 8                     | 0                     | 9                         | 4405.93                       | 4477.10                       | 16612.19                     | 3.77         | 0.2585                                                  | 0.2544                                                  |
| 14           | I      | 1.5                   | 3.0                   | 1352.89                   |                               |                               |                              |              |                                                         |                                                         |
|              |        | 1                     | 0                     | 2                         | 5601.97                       | 5660.30                       | 25055.75                     | 4.47         | 0.2415                                                  | 0.2390                                                  |
| 15           | II     | 1.7                   | 2.0                   | 1492.41                   |                               |                               |                              |              |                                                         |                                                         |
|              |        | 3                     | 0                     | 5                         | 4646.75                       | 4711.56                       | 17092.75                     | 3.68         | 0.3212                                                  | 0.3168                                                  |
| 16           | II     | 1.7                   | 2.5                   | 1380.70                   |                               |                               |                              |              |                                                         |                                                         |
|              |        | 6                     | 0                     | 4                         | 3941.02                       | 4286.97                       | 13014.88                     | 3.30         | 0.3503                                                  | 0.3221                                                  |
| 17           | II     | 2.0                   | 3.0                   | 1505.91                   |                               |                               |                              |              |                                                         |                                                         |
|              |        | 7                     | 0                     | 1                         | 4389.66                       | 4480.54                       | 16843.04                     | 3.84         | 0.3431                                                  | 0.3361                                                  |
| 18           | I      | 1.9                   | 3.0                   | 1220.19                   |                               |                               |                              |              |                                                         |                                                         |
|              |        | 0                     | 0                     | 1                         | 4042.49                       | 4117.68                       | 15443.35                     | 3.82         | 0.3018                                                  | 0.2963                                                  |
| 19           | II     | 2.0                   | 3.0                   | 1984.09                   |                               |                               |                              |              |                                                         |                                                         |
|              |        | 6                     | 0                     | 1                         | 5816.93                       | 5935.61                       | 22372.25                     | 3.85         | 0.3411                                                  | 0.3343                                                  |
| 20           | I      | 1.9                   | 3.0                   | 1405.42                   |                               |                               |                              |              |                                                         |                                                         |
|              |        | 0                     | 0                     | 2                         | 4686.47                       | 4771.20                       | 17742.79                     | 3.79         | 0.2999                                                  | 0.2946                                                  |
| 21           | II     | 2.0                   | 3.0                   | 1470.15                   |                               |                               |                              |              |                                                         |                                                         |
|              |        | 7                     | 0                     | 7                         | 4270.49                       | 4356.94                       | 16214.14                     | 3.80         | 0.3443                                                  | 0.3374                                                  |
| 22           | I      | 1.8                   | 2.0                   | 1143.97                   |                               |                               |                              |              |                                                         |                                                         |
|              |        | 3                     | 0                     | 6                         | 4395.21                       | 4477.85                       | 16705.70                     | 3.80         | 0.2603                                                  | 0.2555                                                  |
| 23           | II     | 1.8                   | 2.0                   | 1140.28                   |                               |                               |                              |              |                                                         |                                                         |
|              |        | 4                     | 0                     | 6                         | 4427.23                       | 4513.33                       | 16916.86                     | 3.82         | 0.2576                                                  | 0.2526                                                  |
| 24           | I      | 1.7                   | 2.0                   | 1315.03                   |                               |                               |                              |              |                                                         |                                                         |
|              |        | 9                     | 0                     | 4                         | 4600.98                       | 4671.58                       | 17472.25                     | 3.80         | 0.2858                                                  | 0.2815                                                  |
| Mean         |        | 1.8                   | 2.5                   | 1320.57                   |                               |                               |                              |              |                                                         |                                                         |
|              |        | 3                     | 4                     | 8                         | 4520.85                       | 4635.99                       | 17118.79                     | 3.77         | 0.2936                                                  | 0.2856                                                  |
| Gmean        |        | 1.8                   | 2.5                   | 1299.25                   |                               |                               |                              |              |                                                         |                                                         |
|              |        | 2                     | 0                     | 0                         | 4448.57                       | 4571.08                       | 16732.26                     | 3.76         | 0.2921                                                  | 0.2842                                                  |

|         |     |     |         |         |         |          |      |        |        |
|---------|-----|-----|---------|---------|---------|----------|------|--------|--------|
|         | 1.8 | 2.5 | 1304.04 |         |         |          |      |        |        |
| Mediana | 4   | 0   | 5       | 4416.58 | 4496.93 | 16879.95 | 3.79 | 0.2878 | 0.2803 |
|         | 1.4 | 2.0 |         |         |         |          |      |        |        |
| Minimum | 2   | 0   | 945.489 | 2880.87 | 3044.90 | 9917.61  | 3.30 | 0.2415 | 0.2390 |
|         | 2.0 | 3.0 | 1984.09 |         |         |          |      |        |        |
| Maximum | 7   | 0   | 1       | 6454.10 | 6571.64 | 25055.75 | 4.47 | 0.3503 | 0.3374 |
|         | 0.1 | 0.4 |         |         |         |          |      |        |        |
| SD      | 8   | 4   | 249.011 | 840.65  | 814.21  | 3737.72  | 0.22 | 0.0311 | 0.0292 |
|         |     | 17. |         |         |         |          |      |        |        |
| CV      | 9.8 | 3   | 18.9    | 18.6    | 17.6    | 21.8     | 5.7  | 10.6   | 10.2   |

**Table S8.** Pharmacokinetic parameters of omeprazole in the blood plasma of volunteers after a single dose of Losec® (reference drug "R").

| Randomized № | Period | T <sub>1/2</sub><br>h | t <sub>max</sub><br>h | C <sub>max</sub><br>ng/ml | AUC <sub>0</sub><br>→t<br>ng/ml×h | AUC <sub>0</sub><br>→∞<br>ng/ml×h | AUMC<br>ng/ml×h <sup>2</sup> | MR<br>T<br>h | C <sub>max</sub> /AUC<br>0→t<br>h <sup>-1</sup> | C <sub>max</sub> /AUC <sub>0</sub><br>→∞<br>h <sup>-1</sup> |
|--------------|--------|-----------------------|-----------------------|---------------------------|-----------------------------------|-----------------------------------|------------------------------|--------------|-------------------------------------------------|-------------------------------------------------------------|
|              |        | 1.9                   | 2.0                   | 1301.3                    | 4450.3                            | 4529.8                            | 16542.1                      |              |                                                 |                                                             |
| 01           | I      | 2                     | 0                     | 87                        | 7                                 | 9                                 | 1                            | 3.72         | 0.2924                                          | 0.2873                                                      |
|              |        | 1.8                   | 2.5                   | 1387.0                    | 4709.6                            | 4791.2                            | 17261.5                      |              |                                                 |                                                             |
| 02           | I      | 8                     | 0                     | 52                        | 4                                 | 6                                 | 3                            | 3.67         | 0.2945                                          | 0.2895                                                      |
|              |        | 1.9                   | 2.0                   | 926.91                    | 3205.7                            | 3571.6                            | 11270.7                      |              |                                                 |                                                             |
| 03           | II     | 7                     | 0                     | 0                         | 2                                 | 3                                 | 3                            | 3.52         | 0.2891                                          | 0.2595                                                      |
|              |        | 1.7                   | 3.0                   | 782.76                    | 2773.4                            | 2988.4                            |                              |              |                                                 |                                                             |
| 04           | II     | 3                     | 0                     | 1                         | 1                                 | 9                                 | 9719.34                      | 3.50         | 0.2822                                          | 0.2619                                                      |
|              |        | 1.9                   | 3.0                   | 1441.7                    | 4905.1                            | 4994.5                            | 18232.1                      |              |                                                 |                                                             |
| 05           | I      | 5                     | 0                     | 88                        | 5                                 | 2                                 | 8                            | 3.72         | 0.2939                                          | 0.2887                                                      |
|              |        | 1.8                   | 2.0                   | 1375.3                    | 5300.8                            | 5406.2                            | 21144.6                      |              |                                                 |                                                             |
| 06           | II     | 9                     | 0                     | 91                        | 6                                 | 0                                 | 6                            | 3.99         | 0.2595                                          | 0.2544                                                      |
|              |        | 1.4                   | 3.0                   | 1109.8                    | 4040.5                            | 4298.5                            | 14252.6                      |              |                                                 |                                                             |
| 07           | II     | 4                     | 0                     | 44                        | 9                                 | 4                                 | 8                            | 3.53         | 0.2747                                          | 0.2582                                                      |
|              |        | 1.4                   | 3.0                   | 1068.3                    | 3849.1                            | 4099.5                            | 13621.5                      |              |                                                 |                                                             |
| 08           | II     | 5                     | 0                     | 67                        | 8                                 | 7                                 | 6                            | 3.54         | 0.2776                                          | 0.2606                                                      |
|              |        | 1.9                   | 2.0                   | 1327.8                    | 4517.8                            | 4604.7                            | 17072.2                      |              |                                                 |                                                             |
| 09           | I      | 4                     | 0                     | 30                        | 8                                 | 8                                 | 5                            | 3.78         | 0.2939                                          | 0.2884                                                      |
|              |        | 2.0                   | 3.0                   | 1315.2                    | 4651.0                            | 4733.9                            | 17492.9                      |              |                                                 |                                                             |
| 10           | II     | 2                     | 0                     | 46                        | 7                                 | 6                                 | 1                            | 3.76         | 0.2828                                          | 0.2778                                                      |
|              |        | 1.7                   | 2.5                   | 1055.6                    | 3469.0                            | 3533.5                            | 12931.5                      |              |                                                 |                                                             |
| 11           | II     | 7                     | 0                     | 76                        | 2                                 | 5                                 | 6                            | 3.73         | 0.3043                                          | 0.2988                                                      |
|              |        | 2.2                   | 2.5                   | 1146.3                    | 3368.7                            | 3744.4                            | 11348.0                      |              |                                                 |                                                             |
| 12           | I      | 0                     | 0                     | 25                        | 7                                 | 1                                 | 0                            | 3.37         | 0.3403                                          | 0.3061                                                      |
|              |        | 1.7                   | 2.0                   | 1163.4                    | 4531.1                            | 4603.3                            | 17125.6                      |              |                                                 |                                                             |
| 13           | I      | 1                     | 0                     | 93                        | 1                                 | 7                                 | 8                            | 3.78         | 0.2568                                          | 0.2527                                                      |
|              |        | 1.7                   | 2.0                   | 1101.5                    | 4302.7                            | 4370.8                            | 16210.4                      |              |                                                 |                                                             |
| 14           | II     | 6                     | 0                     | 25                        | 4                                 | 0                                 | 7                            | 3.77         | 0.2560                                          | 0.2520                                                      |
|              |        | 1.7                   | 2.0                   | 1066.7                    | 4189.9                            | 4252.4                            | 15747.6                      |              |                                                 |                                                             |
| 15           | I      | 1                     | 0                     | 64                        | 7                                 | 0                                 | 9                            | 3.76         | 0.2546                                          | 0.2509                                                      |
|              |        | 1.4                   | 2.5                   | 1280.5                    | 4134.4                            | 4364.4                            | 14046.3                      |              |                                                 |                                                             |
| 16           | I      | 6                     | 0                     | 77                        | 6                                 | 6                                 | 9                            | 3.40         | 0.3097                                          | 0.2934                                                      |
|              |        | 1.8                   | 2.0                   | 1221.4                    | 4571.9                            | 4664.6                            | 17550.9                      |              |                                                 |                                                             |
| 17           | I      | 7                     | 0                     | 20                        | 4                                 | 7                                 | 1                            | 3.84         | 0.2672                                          | 0.2618                                                      |
|              |        | 1.8                   | 2.0                   | 1698.9                    | 5547.7                            | 5642.9                            | 20732.1                      |              |                                                 |                                                             |
| 18           | II     | 1                     | 0                     | 26                        | 8                                 | 6                                 | 0                            | 3.74         | 0.3062                                          | 0.3011                                                      |

|                |           |     |     |        |        |        |         |      |        |        |
|----------------|-----------|-----|-----|--------|--------|--------|---------|------|--------|--------|
|                |           | 1.9 | 3.0 | 1440.8 | 4881.7 | 4982.1 | 18667.4 |      |        |        |
| <b>19</b>      | <b>I</b>  | 6   | 0   | 01     | 8      | 9      | 2       | 3.82 | 0.2951 | 0.2892 |
|                |           | 1.8 | 2.5 | 1789.8 | 5566.9 | 5650.5 | 20568.9 |      |        |        |
| <b>20</b>      | <b>II</b> | 3   | 0   | 98     | 9      | 7      | 3       | 3.69 | 0.3215 | 0.3168 |
|                |           | 1.9 | 3.0 | 1218.0 | 4039.6 | 4121.0 | 15391.4 |      |        |        |
| <b>21</b>      | <b>I</b>  | 5   | 0   | 77     | 5      | 8      | 6       | 3.81 | 0.3015 | 0.2956 |
|                |           | 1.8 | 2.5 | 1500.2 | 4554.6 | 4625.2 | 16795.1 |      |        |        |
| <b>22</b>      | <b>II</b> | 6   | 0   | 25     | 5      | 5      | 0       | 3.69 | 0.3294 | 0.3244 |
|                |           | 1.8 | 2.0 | 1288.5 | 4464.6 | 4534.5 | 16943.7 |      |        |        |
| <b>23</b>      | <b>I</b>  | 0   | 0   | 43     | 5      | 1      | 8       | 3.80 | 0.2886 | 0.2842 |
|                |           | 1.8 | 2.5 | 1563.2 | 4869.5 | 4942.9 | 18099.4 |      |        |        |
| <b>24</b>      | <b>II</b> | 0   | 0   | 54     | 1      | 7      | 2       | 3.72 | 0.3210 | 0.3163 |
|                |           | 1.8 | 2.4 | 1273.8 | 4370.7 | 4502.1 | 16198.7 |      |        |        |
| <b>Mean</b>    |           | 2   | 4   | 37     | 0      | 7      | 0       | 3.69 | 0.2914 | 0.2821 |
|                |           | 1.8 | 2.4 | 1253.0 | 4313.6 | 4456.1 | 15915.5 |      |        |        |
| <b>Gmean</b>   |           | 1   | 0   | 36     | 9      | 5      | 9       | 3.69 | 0.2905 | 0.2812 |
|                |           | 1.8 | 2.5 | 1284.5 | 4491.2 | 4568.9 | 16869.4 |      |        |        |
| <b>Mediana</b> |           | 5   | 0   | 60     | 6      | 4      | 4       | 3.72 | 0.2932 | 0.2878 |
|                |           | 1.4 | 2.0 | 782.76 | 2773.4 | 2988.4 |         |      |        |        |
| <b>Minimum</b> |           | 4   | 0   | 1      | 1      | 9      | 9719.34 | 3.37 | 0.2546 | 0.2509 |
|                |           | 2.2 | 3.0 | 1789.8 | 5566.9 | 5650.5 | 21144.6 |      |        |        |
| <b>Maximum</b> |           | 0   | 0   | 98     | 9      | 7      | 6       | 3.99 | 0.3403 | 0.3244 |
|                |           | 0.1 | 0.4 | 233.31 |        |        |         |      |        |        |
| <b>SD</b>      |           | 8   | 3   | 1      | 695.23 | 640.08 | 2960.81 | 0.15 | 0.0233 | 0.0226 |
|                |           |     | 17. |        |        |        |         |      |        |        |
| <b>CV</b>      |           | 9.9 | 4   | 18.3   | 15.9   | 14.2   | 18.3    | 4.0  | 8.0    | 8.0    |
